# Supplementary material for: Patterns of livestock depredation by tiger (Panthera tigris) and leopard (Panthera pardus) in and around Corbett Tiger Reserve, Uttarakhand, India
Source: PLoS One. 2018 May 24;13(5):e0195612. doi: 10.1371/journal.pone.0195612 (PMC5967810; doi:10.1371/journal.pone.0195612)
Supplement: S2 Table — (XLSX) [file pone.0195612.s002.xlsx]

## Sheet: Table
	Livestock depredation by tiger	Tiger %	Livestock depredation by leopard	Leopard %	Total Cases
2006	457	63.7378	260	36.2622	717
2007	563	72.6452	212	27.3548	775
2008	703	72.3251	269	27.6749	972
2009	822	73.1317	302	26.8683	1124
2010	667	68.6921	304	31.3079	971
2011	648	68.8629	293	31.1371	941
2012	436	61.669	271	38.331	707
2013	500	65.9631	258	34.0369	758
2014	467	66.9054	231	33.0946	698
2015	470	66.9516	232	33.0484	702
Total	5733	68.5356	2632	31.4644	8365
Percentage	68.5356		31.4644		100
Average	573.3		263.2
StaDev	130.324		31.3078
SE	41.2122		9.90039
